# Supplementary figures and images for: Efficacy of Sublingual Immunotherapy for House Dust Mite-Induced Allergic Rhinitis: A Meta-Analysis of Randomized Controlled Trials
Source: PubMed Central journal article supplement — Allergy Asthma Immunol Res. 2016 Dec 21;9(3):220–8. doi: 10.4168/aair.2017.9.3.220 (PMC5352573; doi:10.4168/aair.2017.9.3.220), 2016-12-21

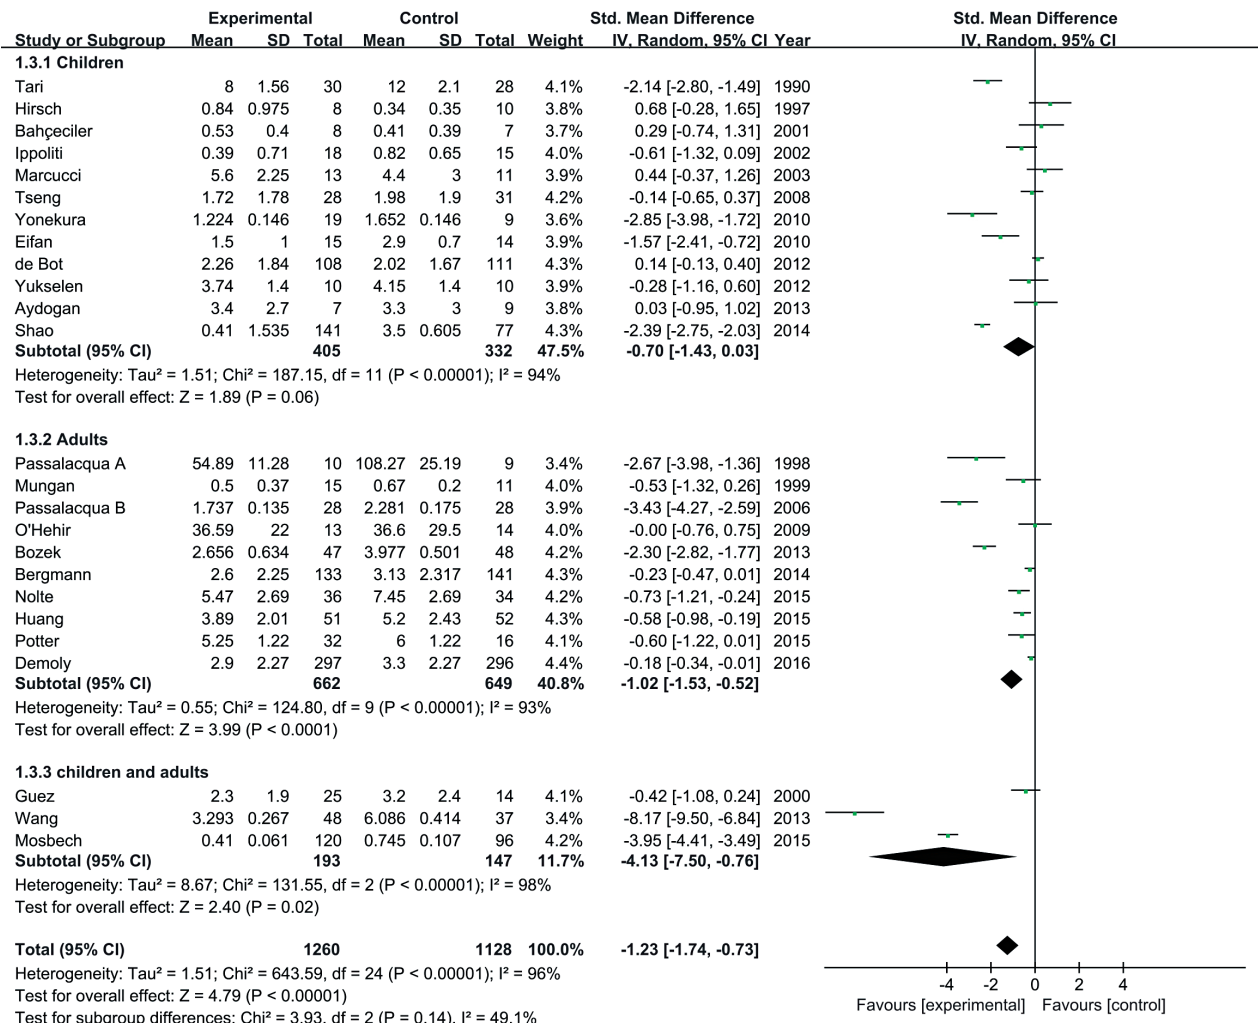

Supplementary Figure. Subgroup analysis of efficacy according to age.

Supplement: aair-9-220-s001.pdf [file aair-9-220-s001.pdf]
